# Supplementary material for: Emission Quenching in Tetraphenylfuran Crystal: Why This Propeller-Shaped Molecule Does Not Emit in the Condensed Phase
Source: MDPI journal article supplement (doi:10.3390/molecules27020522), 2022-01-14
Supplement: s1 [file s1]

**Supporting Information For:**

**Emission quenching in tetraphenylfuran crystal:**

**Why this propeller-shaped molecule does not**

**emit in the condensed phase?**

Ljiljana Stojanović, and Rachel Crespo-Otero\*

*School of Physical and Chemical Sciences,  
Queen Mary University of London, Mile End Road, London E1 4NS, UK*

E-mail: [r.crespo-otero@qmul.ac.uk](mailto:r.crespo-otero@qmul.ac.uk)

# Contents

|                                     |   |
|-------------------------------------|---|
| S1 Geometries                       | 3 |
| S2 The CASSCF active space orbitals | 3 |

## S1 Geometries

The optimised geometries of the ground, excited states, and the minimum energy crossing points between the ground state and  $S_1$  state and the ground state and  $T_1$  state discussed in the main paper are deposited at: [https://github.com/Crespo-Otero-group/TPF\\_data](https://github.com/Crespo-Otero-group/TPF_data)

## S2 The CASSCF active space orbitals

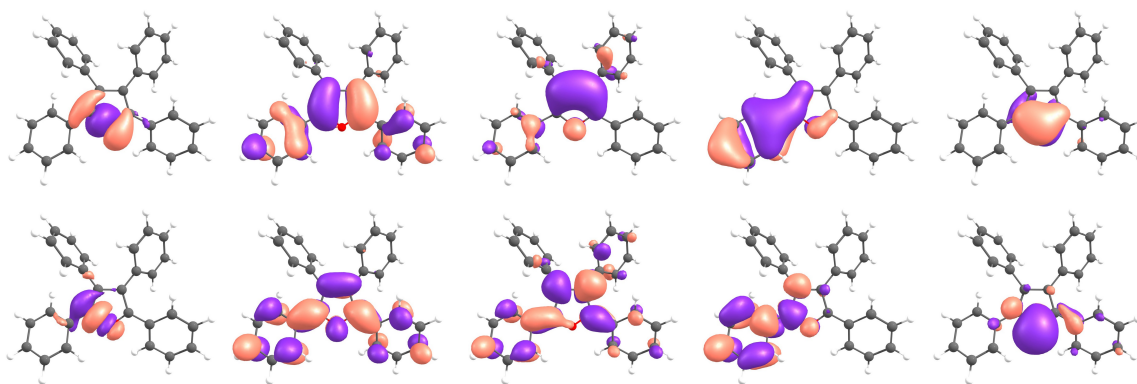

Figure S1: The CASSCF(10,10)/6-31G(d) orbitals used in the  $S_0/S_1$  and  $S_0/T_1$  minimum energy crossing point optimisations and MS-3-CASPT2/SA-3-CASSCF(10,10)/6-31G(d) single point computations along the optimised pathways in the vacuum and crystal.
